# Supplementary material for: A three-stage search strategy combining database reduction and retention time filtering to improve the sensitivity of low-input and single-cell proteomic analysis
Source: Royal Society of Chemistry journal article supplement (doi:10.1039/d3ay00191a), 2023-01-01
Supplement: d3ay00191a1.pdf [file d3ay00191a1.pdf]

## Supporting Information

### **A three-stage search strategy combining database reduction and retention time filtering to improve the sensitivity of low-input and single-cell proteomic analysis**

Wei Fang<sup>1</sup>, Zhuokun Du<sup>1</sup>, Linlin Kong<sup>1</sup>, Guibin Wang<sup>1</sup>, Yangjun Zhang<sup>1</sup>, Weijie Qin<sup>1,2\*</sup>

<sup>1</sup> State Key Laboratory of Proteomics, Beijing Institute of Lifeomics, National Center for Protein Sciences Beijing, Beijing Proteome Research Center, Beijing 102206, P.R. China

<sup>2</sup> College of Chemistry and Environmental Science, Hebei University, Baoding, 071002, China

\* Correspondence: [aunp\\_dna@126.com](mailto:aunp_dna@126.com)

## Table of Contents

|                                                                                                                                                                                                                                       |      |
|---------------------------------------------------------------------------------------------------------------------------------------------------------------------------------------------------------------------------------------|------|
| <b>Parameters for the conventional search with Sequest HT and Sequest HT + Percolator</b>                                                                                                                                             | S-3  |
| <b>Parameters for the three-stage search with Sequest HT and Sequest HT + Percolator</b>                                                                                                                                              | S-3  |
| <b>Fig. S1</b> Number of peptides (A) and protein groups (B) obtained using different FDR levels in the first search.                                                                                                                 | S-4  |
| <b>Fig. S2</b> Comparison of the number of peptides and proteins derived from 200 pg, 500 pg and 1 ng of peptides by conventional search, three-stage search and full database search with 10% FDR setting and $\Delta$ RT filtering. | S-5  |
| <b>Fig. S3</b> Comparison of the Pearson coefficients of the predicted and measured retention times using different prediction models retrained by 5% (A), 15% (B), 30% (C) and 50% (D) of the total 19276 peptides.                  | S-6  |
| <b>Fig. S4</b> Comparison of the number of protein groups and peptides identified by the conventional and the three-stage searches with the engines Sequest HT (A) and Sequest HT + Percolator (B).                                   | S-7  |
| <b>Fig. S5</b> Venn diagrams illustrating the overlap between Sequest HT + Percolator with conventional search and Sequest HT with three-stage search for protein groups derived from 200 pg – 1 ng of peptides.                      | S-8  |
| <b>Fig. S6</b> Characteristic analysis of peptides and proteins gained and lost in TS compared to CS.                                                                                                                                 | S-9  |
| <b>Fig. S7</b> Volcano plots displaying the differences in protein abundance between single interneurons and single motor neurons.                                                                                                    | S-10 |
| <b>Table S1.</b> $\Delta$ RT comparison of datasets with different sample sizes, gradient times and flow rates.                                                                                                                       | S-11 |
| <b>Table S2.</b> Estimation of FDR for the three-stage search based on the results of the target-decoy strategy.                                                                                                                      | S-12 |
| <b>Table S3.</b> Comparison of FDPs at peptide level between the conventional and the three-stage searches by mixing the yeast and human databases.                                                                                   | S-13 |
| <b>Table S4.</b> Comparison of FDPs at protein level between the conventional and the three-stage searches by mixing the yeast and human databases.                                                                                   | S-14 |
| <b>Table S5.</b> Comparison of the candidate peptides of the 52 low-quality spectra in the CS and the TS and the resulting candidate peptides after $\Delta$ RT filtering.                                                            | S-15 |
| <b>References</b>                                                                                                                                                                                                                     | S-18 |

### **Parameters for the Conventional Search with Sequest HT and Sequest HT + Percolator**

The test of Sequest HT engine was carried out on Proteome Discoverer Software (version 2.4, San Jose, CA). Raw files were searched against the human Uniprot database (release on 2021.06.29, 20386 entries). Cysteine carbamidomethylation was set as fixed modification (removed for samples without alkylation), whereas methionine oxidation and acetyl N-terminal were set as variable modifications. Trypsin/P was selected as the digestion enzyme with a maximum missed cleavage of two. The maximum peptide mass was set as 5000 and the mass tolerances of precursor ions and fragment ions were 5 ppm and 0.02 Da, respectively. The false discovery rate was set  $< 0.01$  for both PSM and protein. The validation of PSM was performed using either Percolator (Sequest HT + Percolator search) or Target decoy (Sequest HT search). Other nodes such as “Spectrum Files”, “Minora Feature Detector” and “Spectrum Selector” were used with default settings.

### **Parameters for the Three-stage Search with Sequest HT and Sequest HT + Percolator**

Raw data was first searched using the same parameters as conventional search, except that the FDR were set  $< 0.4$ . Then, the identified proteins were used as a new database. The identified peptides with  $PEP < 0.025$  and  $XCORR \geq 1$  were used to retrain the retention time (RT) prediction model AutoRT<sup>1</sup>. Secondly, the raw files were searched against the new database using the FDR setting  $< 0.1$ . Then the actual measured RTs of the peptides identified in the second search in different runs were calibrated using the AMRT<sup>2</sup> method and the predicted RTs were obtained by applying the retrained autoRT (modified peptides were excluded). Followingly, the  $\Delta RT$  (difference between the measured and the predicted RT) for each peptide was calculated and used as a filtering criterion instead of PEP value to reduce the FDR. Briefly, the peptides were filtered according to the  $\Delta RT$ s from large to small until the proportions of remaining peptides and proteins from decoy database were below 1% and the  $\Delta RT$ s were limited to below  $3\sigma$ , in which  $\sigma$  stood for the standard deviation of the  $\Delta RT$ s of confident peptides (score  $\geq 20$  and  $PEP < 0.025$ ).

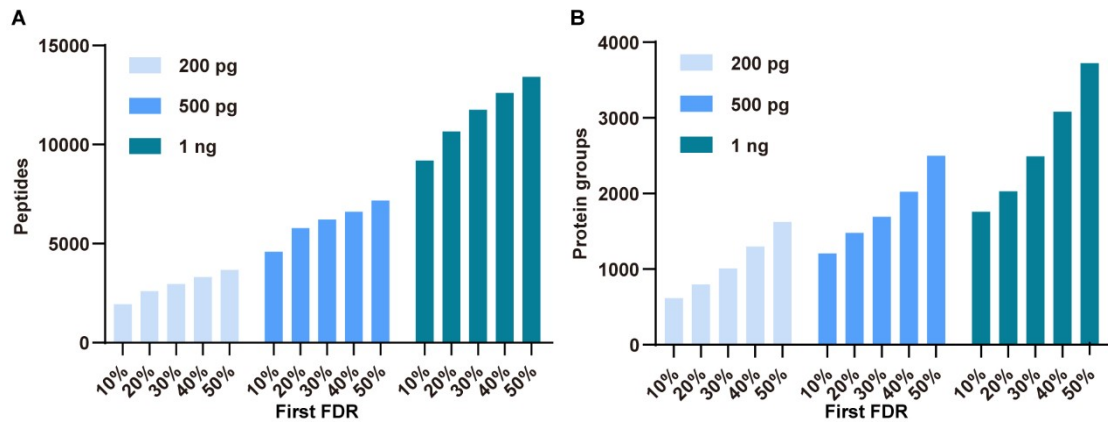

**Fig. S1** Number of peptides (A) and protein groups (B) obtained using different FDR levels in the first search.

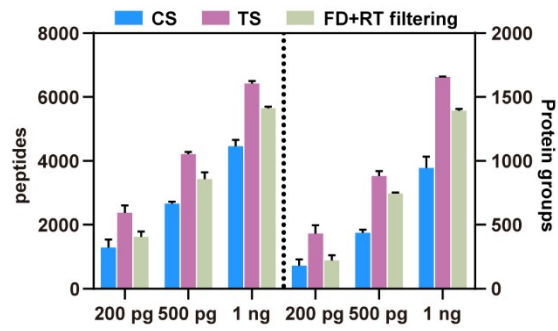

**Fig. S2** Comparison of the number of peptides and proteins derived from 200 pg, 500 pg and 1 ng of peptides by conventional search, three-stage search and full database search with 10% FDR setting and  $\Delta$ RT filtering. (CS: conventional search, TS: three-stage search, FD+RT filtering: full database search with 10% FDR setting and  $\Delta$ RT filtering)

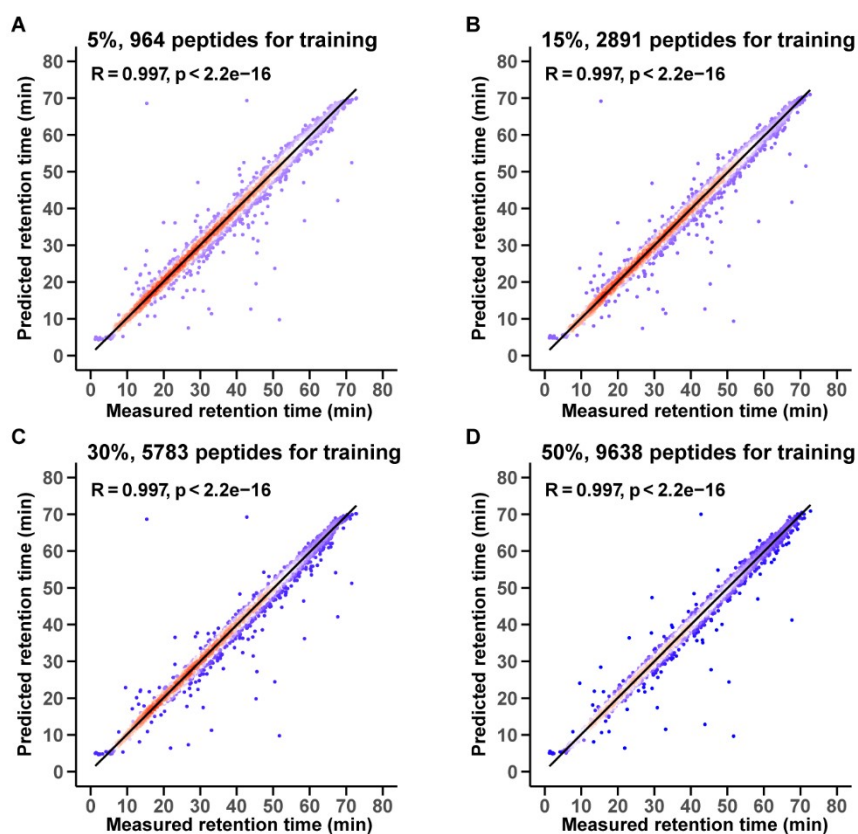

**Fig. S3** Comparison of the Pearson coefficients of the predicted and measured retention times using different prediction models retrained by 5% (A), 15% (B), 30% (C) and 50% (D) of the total 19276 peptides. The remaining peptide datasets were used for testing, except for those used for training.

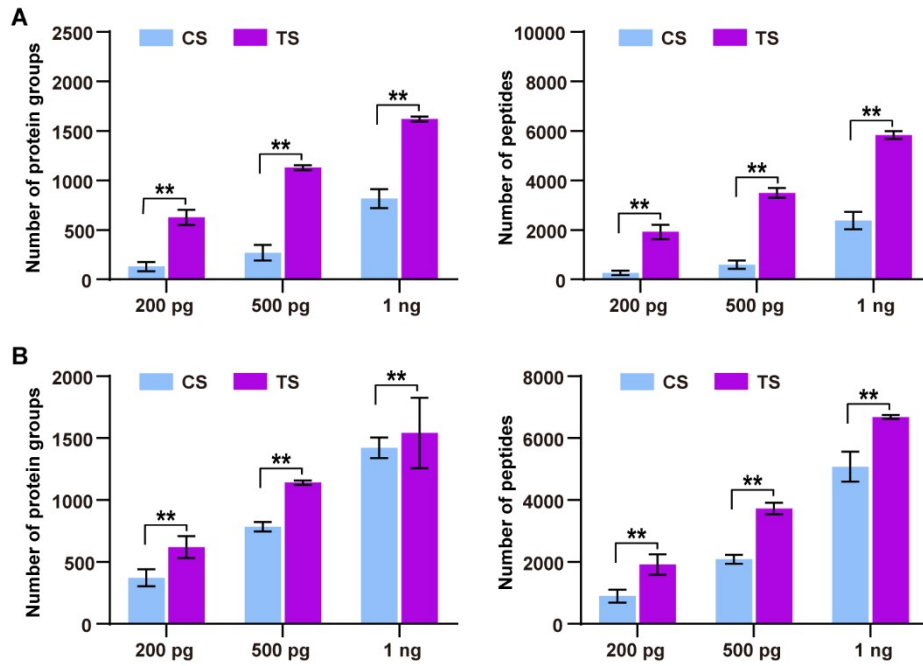

**Fig. S4** Comparison of the number of protein groups and peptides identified by the conventional and the three-stage searches with the engines Sequest HT (A) and Sequest HT + Percolator (B). (CS: conventional search, TS: three-stage search, The \*\* symbol indicates a statistically significant increase ( $P < 0.01$ ),  $N = 3$ )

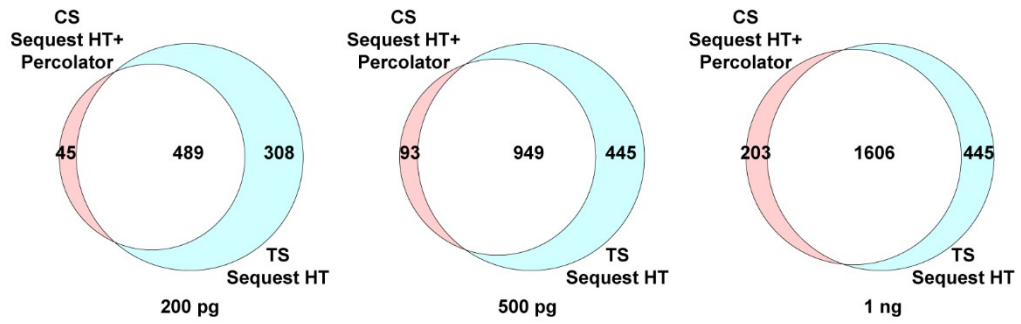

**Fig. S5** Venn diagrams illustrating the overlap between Sequest HT + Percolator with the conventional search and Sequest HT with the three-stage search for protein groups derived from 200 pg – 1 ng of peptides. (CS: conventional search, TS: three-stage search)



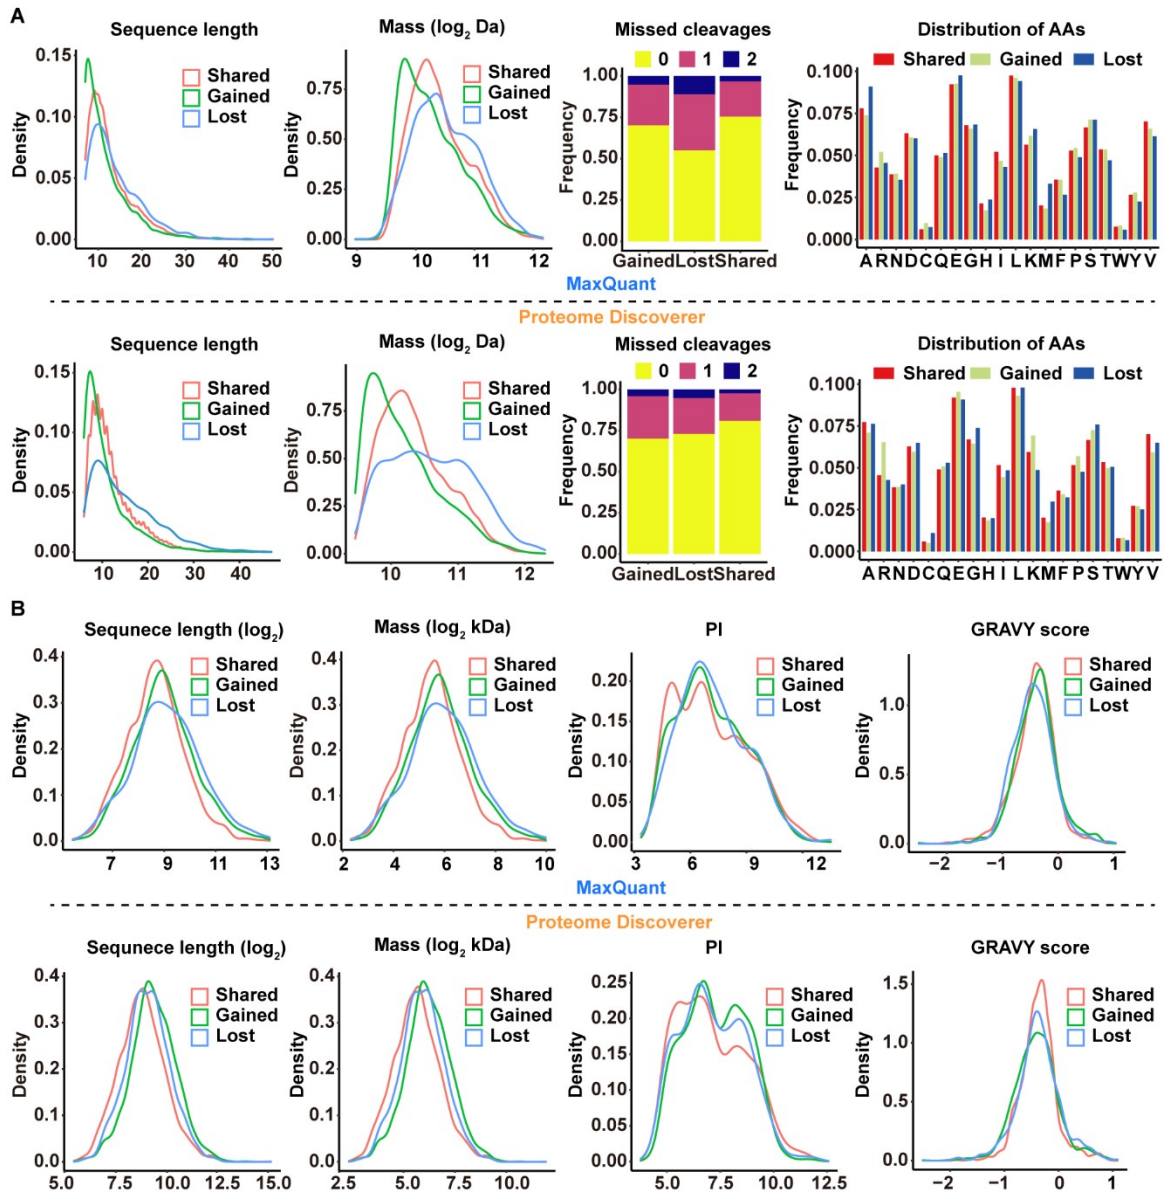

**Fig. S6** Characteristic analysis of peptides and proteins gained and lost in TS compared to CS. (A) Kernel density estimation curve displaying the distribution of sequence length, mass, number of missed cleavages and AAs (amino acids) of peptides gained and lost in MaxQuant and Proteome Discoverer. (B) Kernel density estimation curve displaying the distribution of sequence length, mass, PI (isoelectric point) and GRAVY score of proteins gained and lost in MaxQuant and Proteome Discoverer. (CS: conventional search, TS: three-stage search)

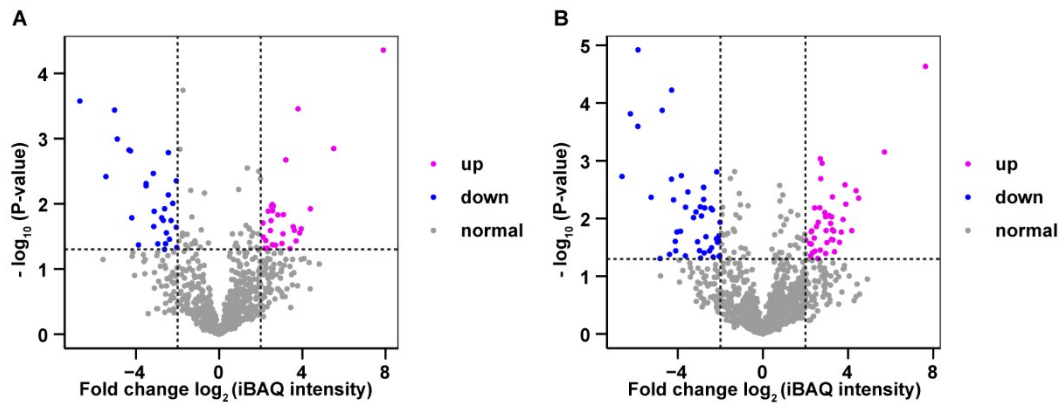

**Fig. S7** Volcano plots displaying the differences in protein abundance between single interneurons and single motor neurons. (A) Volcano plot based on protein groups quantified by the conventional search. (B) Volcano plot based on protein groups quantified by the three-stage search. (Red dots represent proteins enriched in interneurons and blue dots represent proteins enriched in motor neurons,  $N = 3$ ).

**Table S1.**  $\Delta$ RT comparison of datasets with different sample sizes, gradient times and flow rates.

| Sample          | Gradient time (min) | Flow rate (nL/min) | $\Delta$ RT (min) | $\sigma$ (min) | $\Delta$ RT/ $\sigma$ |
|-----------------|---------------------|--------------------|-------------------|----------------|-----------------------|
| 500 ng (A)      | 75                  | 300                | 1.539             | 0.513          | 3.00                  |
| 50 ng (A)       | 75                  | 300                | 1.602             | 0.534          | 3.00                  |
| 10 ng (A)       | 75                  | 300                | 1.128             | 0.376          | 2.74                  |
| 1 ng (A)        | 75                  | 300                | 0.669             | 0.236          | 2.83                  |
| 500 pg (A)      | 75                  | 300                | 0.693             | 0.286          | 2.42                  |
| 200 pg (A)      | 75                  | 300                | 0.861             | 0.287          | 3.00                  |
| 100 cells (A)   | 75                  | 300                | 1.110             | 0.379          | 2.93                  |
| 10 cells (A)    | 75                  | 300                | 0.806             | 0.359          | 2.25                  |
| 1 ng (D)        | 80                  | 250                | 1.552             | 0.517          | 3.00                  |
| 500 pg (D)      | 80                  | 250                | 1.284             | 0.428          | 3.00                  |
| 250 pg (D)      | 80                  | 250                | 1.351             | 0.450          | 3.00                  |
| single cell (B) | 160                 | 20                 | 3.600             | 1.200          | 3.00                  |
| 100 cells (C)   | 170                 | 12                 | 3.612             | 1.338          | 2.70                  |

A: datasets from our laboratory, B: datasets from PXD019515, C: datasets from PXD020669, D: datasets from PXD024017.

**Table S2.** Estimation of FDR for the three-stage search based on the results of the target-decoy strategy.

| Sample          | FDR_40%_10%    |                |                 |                 | FDR_40%_10%_ΔRT Filtering |                |                 |                 | Peptide FDP <sup>a</sup> (%) | Protein FDP <sup>a</sup> (%) | Peptide FDP <sup>b</sup> (%) | Protein FDP <sup>b</sup> (%) |
|-----------------|----------------|----------------|-----------------|-----------------|---------------------------|----------------|-----------------|-----------------|------------------------------|------------------------------|------------------------------|------------------------------|
|                 | Decoy peptides | Decoy proteins | Target peptides | Target proteins | Decoy peptides            | Decoy proteins | Target peptides | Target proteins |                              |                              |                              |                              |
| 500 ng (A)      | 626±11         | 411±4          | 38,280±475      | 5,941±30        | 56±6                      | 54±6           | 33,187±489      | 5,478±21        | 0.2                          | 1.0                          | 0.2                          | 1.0                          |
| 50 ng (A)       | 473±25         | 342±13         | 24,410±914      | 4,746±74        | 37±5                      | 36±4           | 21,664±780      | 4,254±54        | 0.2                          | 0.8                          | 0.2                          | 0.9                          |
| 10 ng (A)       | 379±21         | 266±11         | 16,899±861      | 3,644±63        | 19±2                      | 19±2           | 12,954±461      | 3,030±37        | 0.1                          | 0.6                          | 0.2                          | 0.6                          |
| 1 ng (A)        | 202±16         | 150±12         | 8,704±230       | 2,082±29        | 16±4                      | 16±4           | 6,623±19        | 1,606±19        | 0.2                          | 1.0                          | 0.3                          | 1.1                          |
| 500 pg (A)      | 129±17         | 103±10         | 4,822±223       | 1,432±20        | 11±3                      | 11±3           | 3,564±160       | 1,072±18        | 0.3                          | 1.0                          | 0.3                          | 1.1                          |
| 200 pg (A)      | 78±16          | 56±11          | 2,204±346       | 823±80          | 5±1                       | 5±1            | 1,722±268       | 593±56          | 0.3                          | 0.8                          | 0.3                          | 1.0                          |
| 100 cells (A)   | 339±43         | 212±16         | 15,926±1469     | 2,794±148       | 24±2                      | 23±3           | 14,157±1384     | 2,477±155       | 0.2                          | 1.0                          | 0.2                          | 1.0                          |
| 10 cells (A)    | 92±14          | 75±9           | 4,848±1278      | 1,302±195       | 10±2                      | 10±2           | 3,623±983       | 1,002±173       | 0.3                          | 1.0                          | 0.3                          | 1.1                          |
| Single-cell (B) | 43±8           | 39±6           | 3,152±386       | 1,098±101       | 5±2                       | 5±2            | 2,540±306       | 925±89          | 0.2                          | 0.5                          | 0.2                          | 0.6                          |
| 100 cells (C)   | 114±2          | 98±3           | 5,926±379       | 1,689±38        | 12±1                      | 12±1           | 5,115±352       | 1,414±43        | 0.2                          | 0.8                          | 0.3                          | 0.9                          |
| 1 ng (D)        | 183±6          | 160±5          | 10,205±57       | 2,756±20        | 21±4                      | 20±4           | 9,248±51        | 2,456±16        | 0.2                          | 0.8                          | 0.2                          | 0.9                          |
| 500 pg (D)      | 183±28         | 145±16         | 7,092±597       | 2,190±125       | 13±4                      | 13±4           | 6,258±500       | 1,911±109       | 0.2                          | 0.7                          | 0.2                          | 0.7                          |
| 250 pg (D)      | 125±31         | 106±24         | 5,018±1221      | 1,687±304       | 12±5                      | 11±5           | 4,433±1100      | 1,437±281       | 0.3                          | 0.9                          | 0.3                          | 0.9                          |
| FDR             | NA             | NA             | NA              | NA              | NA                        | NA             | NA              | NA              | 0.2                          | 0.8                          | 0.2                          | 0.9                          |

"Before ΔRT Filtering" referred to the results of the second search. "After ΔRT Filtering" meant the above results were further filtered with ΔRT. The FDP<sup>a</sup> was calculated using the formula:  $FDP = N_{decoy}/N_{target} \times 100\%$ . The FDP<sup>b</sup> was calculated using the formula:  $FDP = (N_{decoy}+1)/N_{target} \times 100\%$  as proposed in the literature<sup>3</sup> (He et al. <https://arxiv.org/abs/1501.00537>). (N = 3 – 6, A: datasets from our laboratory, B: datasets from PXD019515, C: datasets from PXD020669, D: datasets from PXD024017)

**Table S3.** Comparison of FDPs at peptide level between the conventional and the three-stage searches by mixing the yeast and human databases.

| Sample          | Conventional search (FDR: 1%) |                    |         | Three-stage search (Before $\Delta$ RT Filtering) |                    | Three-stage search (After $\Delta$ RT Filtering) |                    |         |
|-----------------|-------------------------------|--------------------|---------|---------------------------------------------------|--------------------|--------------------------------------------------|--------------------|---------|
|                 | Yeast Peptides                | Human peptides     | Y/H (%) | Yeast Peptides                                    | Human peptides     | Yeast Peptides                                   | Human peptides     | Y/H (%) |
| 500 ng (A)      | 20 $\pm$ 3                    | 29,644 $\pm$ 511   | 0.1     | 242 $\pm$ 14                                      | 35,912 $\pm$ 369   | 35 $\pm$ 4                                       | 32,642 $\pm$ 395   | 0.1     |
| 50 ng (A)       | 16 $\pm$ 3                    | 17,497 $\pm$ 1351  | 0.1     | 198 $\pm$ 17                                      | 22,807 $\pm$ 872   | 24 $\pm$ 4                                       | 21,295 $\pm$ 762   | 0.1     |
| 10 ng (A)       | 10 $\pm$ 3                    | 9,910 $\pm$ 761    | 0.1     | 137 $\pm$ 11                                      | 15,685 $\pm$ 779   | 17 $\pm$ 1                                       | 14,221 $\pm$ 562   | 0.1     |
| 1 ng (A)        | 14 $\pm$ 2                    | 3,642 $\pm$ 308    | 0.4     | 115 $\pm$ 5                                       | 7,534 $\pm$ 114    | 11 $\pm$ 2                                       | 6,080 $\pm$ 110    | 0.2     |
| 500 pg (A)      | 11 $\pm$ 1                    | 1,656 $\pm$ 78     | 0.7     | 91 $\pm$ 14                                       | 4,024 $\pm$ 230    | 12 $\pm$ 1                                       | 3,463 $\pm$ 182    | 0.4     |
| 200 pg (A)      | 4 $\pm$ 2                     | 699 $\pm$ 181      | 0.6     | 58 $\pm$ 10                                       | 1,763 $\pm$ 270    | 7 $\pm$ 2                                        | 1,555 $\pm$ 227    | 0.5     |
| 100 cells (A)   | 12 $\pm$ 2                    | 12,322 $\pm$ 2,073 | 0.1     | 111 $\pm$ 28                                      | 14,617 $\pm$ 1,606 | 19 $\pm$ 4                                       | 12,854 $\pm$ 2,419 | 0.1     |
| 10 cells (A)    | 10 $\pm$ 4                    | 2,024 $\pm$ 572    | 0.5     | 77 $\pm$ 17                                       | 4,029 $\pm$ 1120   | 18 $\pm$ 3                                       | 3,148 $\pm$ 894    | 0.6     |
| Single-cell (B) | 5 $\pm$ 1                     | 1,724 $\pm$ 261    | 0.3     | 37 $\pm$ 10                                       | 2,394 $\pm$ 326    | 6 $\pm$ 1                                        | 1,977 $\pm$ 260    | 0.3     |
| 100 cells (C)   | 11 $\pm$ 1                    | 2,010 $\pm$ 94     | 0.5     | 90 $\pm$ 8                                        | 4,433 $\pm$ 201    | 12 $\pm$ 2                                       | 3,945 $\pm$ 181    | 0.3     |
| 1 ng (D)        | 8 $\pm$ 2                     | 7,244 $\pm$ 70     | 0.1     | 99 $\pm$ 12                                       | 9,050 $\pm$ 100    | 18 $\pm$ 2                                       | 8,388 $\pm$ 84     | 0.2     |
| 500 pg (D)      | 4 $\pm$ 1                     | 4,468 $\pm$ 474    | 0.1     | 70 $\pm$ 15                                       | 6,237 $\pm$ 574    | 9 $\pm$ 2                                        | 5,694 $\pm$ 498    | 0.2     |
| 250 pg (D)      | 3 $\pm$ 2                     | 2,760 $\pm$ 658    | 0.1     | 42 $\pm$ 14                                       | 3,891 $\pm$ 945    | 7 $\pm$ 1                                        | 3,592 $\pm$ 885    | 0.2     |
| Average         | NA                            | NA                 | 0.3     | NA                                                | NA                 | NA                                               | NA                 | 0.3     |

In the three-stage search, the yeast database was mixed with the reduced human database to be searched against in the second step to estimate the FDP more rigorously. "Before  $\Delta$ RT Filtering" referred to the results of the second search. "After  $\Delta$ RT Filtering" meant the above results were further filtered with  $\Delta$ RT. Y/H ratio is calculated as the ratio of the number of peptides identified from the yeast database to those identified from the human database. (N = 3 – 6, A: datasets from our laboratory, B: datasets from PXD019515, C: datasets from PXD020669, D: datasets from PXD024017)



**Table S4.** Comparison of FDPs at protein level between the conventional and the three-stage searches by mixing the yeast and human databases.

| Sample          | Conventional search (FDR: 1%) |                 |         | Three-stage search (Before $\Delta$ RT Filtering) |                 | Three-stage search (After $\Delta$ RT Filtering) |                 |         |
|-----------------|-------------------------------|-----------------|---------|---------------------------------------------------|-----------------|--------------------------------------------------|-----------------|---------|
|                 | Yeast Proteins                | Human Proteins  | Y/H (%) | Yeast Proteins                                    | Human Proteins  | Yeast Proteins                                   | Human Proteins  | Y/H (%) |
| 500 ng (A)      | 18 $\pm$ 3                    | 5,249 $\pm$ 38  | 0.3     | 180 $\pm$ 13                                      | 5,785 $\pm$ 27  | 30 $\pm$ 5                                       | 5,495 $\pm$ 36  | 0.5     |
| 50 ng (A)       | 15 $\pm$ 2                    | 3,778 $\pm$ 117 | 0.4     | 164 $\pm$ 7                                       | 4,503 $\pm$ 63  | 22 $\pm$ 3                                       | 4,239 $\pm$ 51  | 0.5     |
| 10 ng (A)       | 10 $\pm$ 3                    | 2,475 $\pm$ 43  | 0.4     | 121 $\pm$ 6                                       | 3,337 $\pm$ 42  | 16 $\pm$ 1                                       | 3,071 $\pm$ 36  | 0.5     |
| 1 ng (A)        | 9 $\pm$ 2                     | 1,071 $\pm$ 52  | 0.8     | 98 $\pm$ 7                                        | 1,782 $\pm$ 36  | 10 $\pm$ 1                                       | 1,508 $\pm$ 10  | 0.7     |
| 500 pg (A)      | 11 $\pm$ 1                    | 669 $\pm$ 22    | 1.6     | 86 $\pm$ 12                                       | 1,162 $\pm$ 34  | 10 $\pm$ 1                                       | 997 $\pm$ 27    | 1.0     |
| 200 pg (A)      | 4 $\pm$ 2                     | 310 $\pm$ 62    | 1.3     | 53 $\pm$ 8                                        | 615 $\pm$ 55    | 6 $\pm$ 2                                        | 515 $\pm$ 39    | 1.2     |
| 100 cells (A)   | 11 $\pm$ 2                    | 2,232 $\pm$ 241 | 0.5     | 94 $\pm$ 23                                       | 2,584 $\pm$ 178 | 19 $\pm$ 4                                       | 2,354 $\pm$ 232 | 0.8     |
| 10 cells (A)    | 6 $\pm$ 2                     | 620 $\pm$ 125   | 1.0     | 61 $\pm$ 16                                       | 1,085 $\pm$ 181 | 10 $\pm$ 3                                       | 903 $\pm$ 169   | 1.1     |
| Single-cell (B) | 5 $\pm$ 2                     | 663 $\pm$ 79    | 0.8     | 36 $\pm$ 9                                        | 908 $\pm$ 110   | 6 $\pm$ 1                                        | 793 $\pm$ 94    | 0.8     |
| 100 cells (C)   | 11 $\pm$ 0                    | 799 $\pm$ 24    | 1.4     | 86 $\pm$ 6                                        | 1,402 $\pm$ 31  | 9 $\pm$ 3                                        | 1,220 $\pm$ 25  | 0.7     |
| 1 ng (D)        | 8 $\pm$ 2                     | 2,030 $\pm$ 20  | 0.4     | 84 $\pm$ 10                                       | 2,505 $\pm$ 14  | 18 $\pm$ 2                                       | 2,300 $\pm$ 18  | 0.8     |
| 500 pg (D)      | 4 $\pm$ 1                     | 1,409 $\pm$ 83  | 0.3     | 63 $\pm$ 13                                       | 1,926 $\pm$ 131 | 9 $\pm$ 2                                        | 1,774 $\pm$ 109 | 0.5     |
| 250 pg (D)      | 3 $\pm$ 2                     | 991 $\pm$ 180   | 0.3     | 41 $\pm$ 13                                       | 1,340 $\pm$ 254 | 7 $\pm$ 1                                        | 1,231 $\pm$ 240 | 0.6     |
| Average         | NA                            | NA              | 0.7     | NA                                                | NA              | NA                                               | NA              | 0.7     |

In the three-stage search, the yeast database was mixed with the reduced human database to be searched against in the second step to estimate the FDP more rigorously. "Before  $\Delta$ RT Filtering" referred to the results of the second search "After  $\Delta$ RT Filtering" meant the above results were further filtered with  $\Delta$ RT. Y/H ratio is calculated as the ratio of the number of proteins identified from the yeast database to those identified from the human database. (N = 3 – 6, A: datasets from our laboratory, B: datasets from PXD019515, C: datasets from PXD020669, D: datasets from PXD024017)

**Table S5.** Comparison of the candidate peptides of the 52 low-quality spectra in the CS and the TS and the resulting candidate peptides after  $\Delta$ RT filtering.

| MSMS scan number | Candidate peptides in CS, $\Delta$ RT (min) was indicated in the brackets. The remaining candidate peptides after $\Delta$ RT filtering were labeled in yellow. | Candidate peptides in TS, $\Delta$ RT (min) was indicated in the brackets. The remaining candidate peptides after $\Delta$ RT filtering were labeled in yellow. |
|------------------|-----------------------------------------------------------------------------------------------------------------------------------------------------------------|-----------------------------------------------------------------------------------------------------------------------------------------------------------------|
| 1214             | LGEHNIK (2.27), KPSPEPR (0.90), AVEHINK (0.42), GILHQDK (2.40)                                                                                                  | AVEHINK (0.42), KPSPEPR (0.90)                                                                                                                                  |
| 1520             | VDEEQMK (0.06), VDCEIDK (1.88)                                                                                                                                  | VDEEQMK (0.06)                                                                                                                                                  |
| 1698             | VAQDLCK (0.18), VAINCEK (1.27)                                                                                                                                  | VAQDLCK (0.18)                                                                                                                                                  |
| 1728             | ALHQCNK (4.76), AICDHVR (0.20)                                                                                                                                  | AICDHVR (0.20)                                                                                                                                                  |
| 2128             | ERDKKEEGK (8.62), HNQELHGR (7.25), HLVYESDK (0.17), MFHLPMSK (28.20), GARCTVNGR (6.722), IEGTQADTR (3.87)                                                       | HLVYESDK (0.17)                                                                                                                                                 |
| 2398             | GTDYQLSK (0.27), ASSSLDGFK (7.38)                                                                                                                               | GTDYQLSK (0.27)                                                                                                                                                 |
| 2572             | ATAPQTQHVSPMR (0.75), TDKAEVVNGYEAK (2.04), ENAEVTYSLLER (31.27)                                                                                                | ATAPQTQHVSPMR (0.75)                                                                                                                                            |
| 2592             | LPEPTTR (0.31), LGPEIER (5.64)                                                                                                                                  | LPEPTTR (0.31)                                                                                                                                                  |
| 2627             | TDSDIK (0.27), SLDIDTAK (5.73)                                                                                                                                  | TDSDIK (0.27)                                                                                                                                                   |
| 2693             | VAQPTITDNK (0.37), VYNVTYTVK (13.64), LNATYYITK (17.77)                                                                                                         | VAQPTITDNK (0.37)                                                                                                                                               |
| 2796             | QVEKVVDK (6.13), NIQLSLEK (18.75), SGEVLVNVK (9.98), VQTLIENK (2.96), VQTEVLQK (0.27)                                                                           | SGEVLVNVK (9.98), VQTEVLQK (0.27)                                                                                                                               |
| 2996             | LSLGGYAK (10.34), TVGQLYK (0.43), ISANLYK (4.67), VTFNLSK (13.21)                                                                                               | TVGQLYK (0.43)                                                                                                                                                  |
| 3126             | EAGVVAQAR (5.77), AGEVFIHK (0.34)                                                                                                                               | AGEVFIHK (0.34)                                                                                                                                                 |
| 3311             | TITSSYYR (0.30), TIYFFGDK (29.98)                                                                                                                               | TITSSYYR (0.30)                                                                                                                                                 |
| 3390             | WSPVQSVEK (8.75), QPDSGISSIR (0.25)                                                                                                                             | QPDSGISSIR (0.25)                                                                                                                                               |
| 3434             | ASLTGTPSR (7.31), ASLENSLR (0.11), IASTASSPR (10.79)                                                                                                            | ASLENSLR (0.11)                                                                                                                                                 |
| 3468             | IISDKQR (12.27), LSKENIR (9.27), ISGTVNIR (0.62), LSERNLK (10.11)                                                                                               | ISGTVNIR (0.62)                                                                                                                                                 |
| 3565             | EFSGNPIK (0.74), EEWAKTK (10.30)                                                                                                                                | EFSGNPIK (0.74)                                                                                                                                                 |
| 3566             | IYDLFNR (24.15), LNQYFQK (0.60), IPWSFYK (30.53), LEGDHTIR (9.78), YTAAVPYR (2.50)                                                                              | LEGDHTIR (9.78), LNQYFQK (0.60)                                                                                                                                 |
| 3607             | SAPTSPCDQEIK (4.45), HQEGEIFDTEK (0.01)                                                                                                                         | HQEGEIFDTEK (0.01)                                                                                                                                              |
| 3673             | HPDADSLYVEK (0.14), SQGSGNEAEPLGK (8.69), HDEAFSTEPLK (3.60)                                                                                                    | HPDADSLYVEK (0.14)                                                                                                                                              |
| 3960             | NVVLQYGFK (21.54), IAQITGPPDR (0.35)                                                                                                                            | IAQITGPPDR (0.35)                                                                                                                                               |
| 3989             | IVVAMAK (0.10), LVAMAVK (2.66)                                                                                                                                  | IVVAMAK (0.10)                                                                                                                                                  |
| 4073             | AQASPSEENK (17.79), EQNNDALEK (14.75),                                                                                                                          | DGYNYTLSK (0.75)                                                                                                                                                |

|       |                                                                                                                                                                                                                 |                                           |
|-------|-----------------------------------------------------------------------------------------------------------------------------------------------------------------------------------------------------------------|-------------------------------------------|
|       | DGYNYTL SK (0.75)                                                                                                                                                                                               |                                           |
| 4137  | VVGLEGS DK (8.01), VMEHF IK (0.68)                                                                                                                                                                              | VMEHF IK (0.68)                           |
| 4245  | LVGGTTP GK (13.21), IVEEAL R (4.47),<br>VLDVVER (0.65), LVEAIE R (4.20)                                                                                                                                         | LVGGTTP GK (13.21),<br>VLDVVER (0.65)     |
| 4270  | EIEFLPS R (18.57), TGIDL GTTGR (0.24),<br>LGNSFVPE K (2.35)                                                                                                                                                     | TGIDL GTTGR (0.24)                        |
| 4361  | NLETPLCK (0.39), ARQANDT AK (21.9)                                                                                                                                                                              | NLETPLCK (0.39)                           |
| 4728  | IIHTGEKPY K (15.32), IIYTGEKPH K (14.24),<br>IINNTENLVR (0.58)                                                                                                                                                  | IIHTGEKPY K (15.32),<br>IINNTENLVR (0.58) |
| 4919  | WMPPEAFLEGI FTSK (43.51),<br>NSNLVGAAHEELQ QSR (0.65)                                                                                                                                                           | NSNLVGAAHEELQ QSR (0.65)                  |
| 4948  | VPASLKEK (17.60), VPTISINK (0.01),<br>VDLVAQVK (1.48)                                                                                                                                                           | VPTISINK (0.01),<br>VDLVAQVK (1.48)       |
| 4958  | LEELTMDG AK (0.14), ELRCQCI K (16.28)                                                                                                                                                                           | LEELTMDG AK (0.14)                        |
| 4998  | QPSQGPTFG IK (0.30), ERLEAASQQ K (20.77),<br>QHEVDKLY K (16.50)                                                                                                                                                 | QPSQGPTFG IK (0.30)                       |
| 5408  | SLFGQVLK (18.78), IGQGYLIK (0.17)                                                                                                                                                                               | IGQGYLIK (0.17)                           |
| 5420  | LLEIDISSNK (12.55), LLEFFGHLR (26.44),<br>LLENDLSK (4.69), ILRERDSSR (24.28),<br>LLSNDEVTIK (0.29)                                                                                                              | LLSNDEVTIK (0.29)                         |
| 5552  | TSGTTAAPRV K (22.57), LGSNAGNKSLK<br>(22.38), DKAVLNSVSR (15.27), AYPAPLTSIR<br>(8.73), AKNTGVSVGQK (23.20), AKEKSEIQR<br>(24.88), DSKLTHLFK (2.44),<br>VLQLYPNK (0.23),<br>AEWLNKTVK (7.78), SKNLTDIAR (10.69) | VLQLYPNK (0.23)                           |
| 5868  | QELQSLK (18.64), LEQNTIK (23.98),<br>YPDPLIK (0.73), AVQASIEK (22.69)                                                                                                                                           | YPDPLIK (0.73)                            |
| 6034  | LLGKTCK (24.11), LIGEYGLR (0.33)                                                                                                                                                                                | LIGEYGLR (0.33)                           |
| 6148  | YCNASKGTAR (25.21),<br>ADGYEPPVQESV (0.29),<br>YRSSDSSFWR (8.86)                                                                                                                                                | ADGYEPPVQESV (0.29)                       |
| 6210  | FYWRPHCR (12.01), FYSVNV DYSK (0.18)                                                                                                                                                                            | FYSVNV DYSK (0.18)                        |
| 6267  | CAGTVEVEIQR (10.73),<br>CAGNEDIITLR (0.21)                                                                                                                                                                      | CAGNEDIITLR (0.21)                        |
| 6446  | QADKVWR (24.82), GAWSNVLR (0.37)                                                                                                                                                                                | GAWSNVLR (0.37)                           |
| 6693  | DFQAIADVIGNK (20.96), HRSDLIEHQR (29.77),<br>LGGEVSCLVAGTK (0.66)                                                                                                                                               | LGGEVSCLVAGTK (0.66)                      |
| 7076  | GIHPTIISESFQK (0.64),<br>QSLDVPLREGTNK (12.15)                                                                                                                                                                  | GIHPTIISESFQK (0.64)                      |
| 7816  | FPQLCKFCDVR (2.39),<br>FPQLDSTSFANSR (0.09)                                                                                                                                                                     | FPQLDSTSFANSR (0.09)                      |
| 12070 | GVPQIEVTFDIDANGILN VSAVDK (0.59),                                                                                                                                                                               | GVPQIEVTFDIDANGILN VSAVDK                 |



|              |                                                                                                                                                                                                                                                  |                                            |
|--------------|--------------------------------------------------------------------------------------------------------------------------------------------------------------------------------------------------------------------------------------------------|--------------------------------------------|
|              | QGFLPPLNVNSHPPISDINVNNK (9.23)                                                                                                                                                                                                                   | (0.59)                                     |
| 12109        | ILIIGGSIANFTNVAATFK (0.61),<br>LIQSEVALNDLHLTKQK (24.70)                                                                                                                                                                                         | ILIIGGSIANFTNVAATFK (0.61)                 |
| <b>2780</b>  | LGVIEDHSNR (0.20), VLYMDKENK (0.56)                                                                                                                                                                                                              | LGVIEDHSNR (0.20)                          |
| <b>2972</b>  | ELEEELK (2.85), EIEELEK (0.59), EEELLEK<br>(1.36), ELEEIEK (0.29), EEEELK (2.89)                                                                                                                                                                 | ELEEIEK (0.29)                             |
| <b>6120</b>  | IIVGSFMGYLR (31.48), MPPAEKASRIR (22.38),<br>ERDRVLPSQR (23.60), LTLTAVDGGSPPK (0.18),<br>GLHNVVYGIQR (4.11), SLPTLHERFR (6.14),<br>SAIPIGGSRGAGR (16.34), LQNVNRDIQR<br>(21.89), AVLIPKDDQEK (13.19), FDRPALPANVR<br>(2.53), ILEDNSIPQVK (0.09) | ILEDNSIPQVK (0.09),<br>MPPAEKASRIR (22.38) |
| <b>7126</b>  | LWNTLGVCK (0.56), WERPFEVK (8.58),<br>FSPGLPGYPR (0.62)                                                                                                                                                                                          | LWNTLGVCK (0.56)                           |
| <b>12532</b> | DKATGEVLGQFYLDLYPREGK (7.47),<br>DIAFLEAQIYEYVEILGEQR (0.09),<br>VKQSPGTKLCHGDSELTSGLLAT (28.91),<br>QDQIHSSIVSTLLALMDGLDSR (0.55),<br>AKMASVPVYCLCRLPYDVTR (15.27)                                                                              | DIAFLEAQIYEYVEILGEQR (0.09)                |

## References

- (1) Wen, B.; Li, K.; Zhang, Y.; Zhang, B. Cancer neoantigen prioritization through sensitive and reliable proteogenomics analysis. *Nat. Commun.* **2020**, *11*, 1759.
- (2) Silva, J. C.; Denny, R.; Dorschel, C. A.; Gorenstein, M.; Kass, I. J.; Li, G.-Z.; McKenna, T.; Nold, M. J.; Richardson, K.; Young, P. Quantitative proteomic analysis by accurate mass retention time pairs. *Anal. Chem.* **2005**, *77*, 2187-2200.
- (3) He, K.; Fu, Y.; Zeng, W.-F.; Luo, L.; Chi, H.; Liu, C.; Qing, L.-Y.; Sun, R.-X.; He, S.-M. A theoretical foundation of the target-decoy search strategy for false discovery rate control in proteomics. *arXiv preprint arXiv:1501.00537* **2015**.
